# Supplementary material
Source: publisher figshare collection journal article supplement (https://acs.figshare.com/ndownloader/files/4510600)

## SUPPORTING INFORMATION

### A Practical Total Synthesis of Globo-H for Use in Anticancer Vaccines

Insik Jeon,<sup>1</sup> Karthik Iyer,<sup>1</sup> and Samuel J. Danishefsky<sup>1,2,\*</sup>

#### Table of Contents.

|                                    |             |
|------------------------------------|-------------|
| <b>Experimental Procedures</b>     | <b>2–4</b>  |
| Synthesis of Compound 7            | 2           |
| Synthesis of Compound 8            | 3           |
| Synthesis of Compound 9            | 3           |
| Synthesis of Compound 10           | 4           |
| <b>Spectra</b>                     | <b>5–11</b> |
| <sup>1</sup> H NMR of Compound 6   | 5           |
| <sup>1</sup> H NMR of Compound 8   | 6           |
| <sup>1</sup> H NMR of Compound 7   | 7           |
| <sup>1</sup> H NMR of Compound 9   | 8           |
| <sup>13</sup> C NMR of Compound 9  | 9           |
| <sup>1</sup> H NMR of Compound 10  | 10          |
| <sup>13</sup> C NMR of Compound 10 | 11          |

**Ethyl 2,3,4-tri-*O*-benzyl- $\alpha$ -L-fucopyranosyl-(1 $\rightarrow$ 2)-3,4-carbonyl-6-*O*-tri-isopropylsilyl- $\beta$ -D-galactopyranosyl-(1 $\rightarrow$ 3)-6-*O*-tri-isopropylsilyl-2-deoxy-2-phenylsulfonfylamino-1-thio- $\beta$ -D-galactopyranoside (7).**<sup>1</sup> A solution of thiofucosyl donor **15** (2.38 g, 4.41 mmol) and freshly activated 4 Å molecular sieves (2 g) in CH<sub>2</sub>Cl<sub>2</sub>/Et<sub>2</sub>O (50 mL/25 mL) was stirred at rt for 1 h, then cooled to -78 °C. To the cooled solution was added AgOTf (3.4 g, 13.22 mmol) and 2,6-di-*tert*-butylpyridine (2.92 mL, 13.92 mmol). After 10 min, freshly distilled *p*-TolSCl (619.3  $\mu$ L, 4.41 mmol) was added. After 40 minutes, the characteristic yellow color of *p*-TolSCl in the reaction solution disappeared, indicating depletion of *p*-TolSCl. A solution of acceptor **4** (2.85 g, 4.41 mmol) in CH<sub>2</sub>Cl<sub>2</sub>/Et<sub>2</sub>O (6 mL/3 mL) was added dropwise via a syringe. The reaction mixture was warmed to rt under stirring over 3 h, and stirred for an additional 1 h at rt. The mixture was filtered over Celite and further washed with CH<sub>2</sub>Cl<sub>2</sub>. After evaporation of solvent in vacuo, the mixture was diluted with ethyl acetate then washed with a saturated aqueous solution of NaHCO<sub>3</sub>, water, and brine and dried over MgSO<sub>4</sub>. After removal of the solvent, the crude was purified via silica gel flash chromatography using 10-15% EtOAc/hexane to give 3.66 g (78%) of  $\alpha$ -trisaccharide **6**.<sup>1</sup> <sup>1</sup>H NMR (500 MHz, CDCl<sub>3</sub>)  $\delta$  7.41-7.29 (m, 15H), 6.35 (d, *J* = 5.0 Hz, 1H), 5.01 (d, *J* = 3.7 Hz, 1H), 4.99 (d, *J* = 11.6 Hz, 1H), 4.92 (d, *J* = 4.7 Hz, 1H), 4.87 (d, *J* = 5.0 Hz, 1H), 4.84 (d, *J* = 11.6 Hz, 2H), 4.75 (d, *J* = 11.8 Hz, 1H), 4.71 (dd, *J* = 8.2, 3.6 Hz, 1H), 4.66 (d, *J* = 11.7 Hz, 2H), 4.54 (d, *J* = 6.3 Hz, 1H), 4.44 (m, 1H), 4.12-4.00 (m, 5H), 3.92-3.83 (m, 7H), 3.68 (m, 1H), 2.66 (d, *J* = 2.2 Hz, 1H), 1.15-1.07 (m, 45H); ESI-MS calcd for C<sub>58</sub>H<sub>86</sub>O<sub>14</sub>Si<sub>2</sub>Na<sup>+</sup> 1085.55 (M + Na)<sup>+</sup>, found 1085.39. A mixture of trisaccharide glycal **6** (1 g, 0.94 mmol) and benzenesulfonamide (887 mg, 5.64 mmol) was azeotroped with C<sub>6</sub>H<sub>6</sub> once and further dried on high vacuum for 1 h. It was dissolved in freshly distilled Et<sub>2</sub>O (40 mL), and freshly activated 4 Å molecular sieves (1 g) was added. The resulting mixture was stirred at rt for 1 h, then cooled to -5 °C. To the solution was added I(*sym*-coll)<sub>2</sub>ClO<sub>4</sub> (925 mg, 1.974 mmol) and the mixture was further stirred at -5 °C for 12 h. After filtration on Celite pad, the crude was washed with saturated Na<sub>2</sub>S<sub>2</sub>O<sub>3</sub> solution, saturated CuSO<sub>4</sub>, brine and dried over MgSO<sub>4</sub>. After concentration, the crude material, containing iodosulfonamide **17**, was immediately subjected to the next step without purification. To a solution of EtSH (695  $\mu$ L, 9.4 mmol) in DMF (5 mL) was added lithium bis-(trimethylsilyl)amide (LHMDS, 1.0 M in THF, 4.7 mL, 4.7 mmol) at -45 °C. After 15 min of stirring, the solution was transferred dropwise via a cannula to a flask containing iodosulfonamide **17** in DMF (25 mL) at -45 °C. The reaction mixture was allowed to warm to rt and stirred for a total of 3 h. After dilution with saturated NH<sub>4</sub>Cl, the crude was extracted four times with ethyl acetate. The combined extracts were washed with water and brine and dried over MgSO<sub>4</sub>. Concentration and purification by silica gel chromatography (15-25% EtOAc in hexane) afforded 903 mg (75% over two steps) of DEF donor **7**. <sup>1</sup>H NMR (500 MHz, CDCl<sub>3</sub>)  $\delta$  7.90 (d, *J* = 7.8 Hz, 2H), 7.53 (t, *J* = 7.4 Hz, 1H), 7.47 (t, *J* = 7.4 Hz, 2H), 7.40-7.28 (m, 15H), 5.43 (s, 1H), 5.00 (d, *J* = 3.6 Hz, 1H), 4.98 (d, *J* = 11.6 Hz, 1H), 4.91 (d, *J* = 8.8 Hz, 1H), 4.84 (d, *J* = 7.9 Hz, 1H), 4.82 (d, *J* = 7.9 Hz, 1H), 4.74 (d, *J* = 11.8 Hz, 1H), 4.67-4.62 (m, 4H), 4.37 (d, *J* = 10.2 Hz, 1H), 4.12-4.08 (m, 4H), 4.00 (q, *J* = 6.5 Hz, 1H), 3.94-3.77 (m, 6H), 3.71 (s, 1H), 3.60-3.56 (m, 1H), 3.47 (m, 1H), 2.82 (m, 1H), 2.48-2.44 (m, 1H), 2.32-2.28 (m, 1H), 1.17 (d, *J* = 6.4 Hz, 3H), 1.15-1.05 (m, 45H); <sup>13</sup>C NMR (150 MHz, CDCl<sub>3</sub>)  $\delta$  155.5, 140.7, 138.9, 138.8, 132.9, 129.0, 128.8, 128.6, 128.5, 128.4, 128.2, 128.0, 127.8, 127.8, 127.6, 99.7, 98.1, 83.8, 81.5, 79.4, 77.8, 76.7, 75.1, 74.4, 73.2, 73.1, 71.7, 71.7, 69.8, 68.1, 68.0, 62.2, 62.0, 55.4, 23.8, 18.2, 18.2, 18.1, 17.0, 14.7, 12.3, 12.1, 11.9; ESI-MS calcd for C<sub>66</sub>H<sub>97</sub>O<sub>16</sub>NS<sub>2</sub>Si<sub>2</sub>K<sup>+</sup> 1318.54 (M + K)<sup>+</sup>, found 1318.58.

**4-Pentenyl 2,4,6-tri-*O*-benzyl- $\alpha$ -D-galactopyranosyl-(1 $\rightarrow$ 4)-2,3,6-tri-*O*-benzyl- $\beta$ -D-galactopyranosyl-(1 $\rightarrow$ 4)-2,3,6-tri-*O*-benzyl- $\beta$ -D-glucopyranoside (8).**<sup>2</sup> A solution of thiogalactosyl donor **16** (3.97 g, 5.86 mmol) and freshly activated 4 Å molecular sieves (4 g) in CH<sub>2</sub>Cl<sub>2</sub>/ Et<sub>2</sub>O (100 mL/50 mL) was stirred at rt for 1 h, then cooled to -78 °C. To the cooled solution was added AgOTf (4.52 g, 17.6 mmol) and 2,6-di-*tert*-butylpyridine (3.9 mL, 17.6 mmol). After 10 min, freshly distilled *p*-TolSCl (824  $\mu$ L, 5.86 mmol) was added. After 10 minutes, the characteristic yellow color of *p*-TolSCl in the reaction solution disappeared, indicating depletion of *p*-TolSCl. A solution of acceptor **12** (4.65 g, 4.88 mmol) in CH<sub>2</sub>Cl<sub>2</sub>/ Et<sub>2</sub>O (10 mL/5 mL) was added dropwise via a syringe. The reaction mixture was warmed to rt under stirring over 3 h, and then stirred for an additional 1 h at rt. The mixture was filtered over Celite and further washed with CH<sub>2</sub>Cl<sub>2</sub>. After evaporation of solvent in vacuo, the mixture was diluted with ethyl acetate then washed with a saturated aqueous solution of NaHCO<sub>3</sub>, water, and brine and dried over MgSO<sub>4</sub>. After removal of the solvent, the crude was purified via silica gel flash chromatography using 15% EtOAc/hexane to give 5.55 g (76 %) of  $\alpha$ -trisaccharide **13**. This PMB protected **13** (5.25 g, 3.49 mmol) in CH<sub>2</sub>Cl<sub>2</sub> (130 mL) at 0 °C was treated with phosphate buffer (20 mL, pH 7.2) and 2,3-dichloro-5,6-dicyano-1,4-benzoquinone (DDQ) (1.19 g, 5.24 mmol, 1.5 equiv.) and stirred at 0 °C for 5 h. The reaction mixture was diluted with saturated NaHCO<sub>3</sub> and further stirred at rt for 1 h. The mixture was extracted twice with CH<sub>2</sub>Cl<sub>2</sub>, then washed with brine, dried over MgSO<sub>4</sub>, and concentrated to dryness. The crude material was purified by flash column chromatography using 16% EtOAc/hexane to give 4.06 g (84 %) of ABC acceptor **8**. <sup>1</sup>H NMR (500 MHz, CDCl<sub>3</sub>)  $\delta$  7.42 - 7.16 (m, 45 H), 5.89-5.81 (m, 1H), 5.13 (d, *J* = 3.1 Hz, 1H), 5.10 (d, *J* = 11.4 Hz, 1H), 5.06-4.99 (m, 2H), 4.91-4.85 (m, 2H), 4.81-4.71 (m, 6H), 4.85-4.49 (m, 5H), 4.43-4.38 (m, 3H), 4.31 (s, 2H), 4.19-4.03 (m, 5H), 3.99-3.95 (m, 3H), 3.84-3.80 (m, 2H), 3.76 (d, *J* = 10.0 Hz, 1H), 3.64-3.32 (m, 9H), 3.22 (dd, *J* = 10.0, 5.0 Hz, 1H), 2.22-2.17 (m, 2H), 1.82-1.73 (m, 2H); <sup>13</sup>C NMR (CDCl<sub>3</sub>, 150 MHz)  $\delta$  139.5, 138.8, 138.7, 138.7, 138.6, 138.5, 138.4, 138.3, 138.2, 138.1, 128.5, 128.4, 128.31, 128.30, 128.28, 128.26, 128.24, 128.15, 128.14, 128.06, 128.05, 127.82, 127.77, 127.73, 127.65, 127.64, 127.61, 127.58, 127.57, 127.52, 127.45, 127.2, 114.9, 103.6, 102.8, 99.7, 83.0, 81.8, 81.6, 79.4, 77.7, 75.3, 75.2, 75.2, 75.1, 75.0, 74.9, 73.2, 73.14, 73.08, 73.06, 73.00, 72.2, 70.0, 69.29, 69.25, 68.4, 67.8, 67.7, 60.4, 30.3, 29.0; ESI-MS calcd for C<sub>86</sub>H<sub>94</sub>O<sub>16</sub>Na<sup>+</sup> 1405.64 (M + Na)<sup>+</sup>; found: 1406.02.

**4-Pentenyl 2,3,4-tri-*O*-benzyl- $\alpha$ -L-fucopyranosyl-(1 $\rightarrow$ 2)-3,4-carbonyl-6-*O*-tri-isopropylsilyl- $\beta$ -D-galactopyranosyl-(1 $\rightarrow$ 3)-6-*O*-tri-isopropylsilyl-2-deoxy-2-phenylsulfonylamino- $\beta$ -D-galactopyranosyl-(1 $\rightarrow$ 3)-2,4,6-tri-*O*-benzyl- $\alpha$ -D-galactopyranosyl-(1 $\rightarrow$ 4)-2,3,6-tri-*O*-benzyl- $\beta$ -D-galactopyranosyl-(1 $\rightarrow$ 4)-2,3,6-tri-*O*-benzyl- $\beta$ -D-glucopyranoside (9).**<sup>2</sup> The DEF donor **7** (2.13 g, 1.66 mmol) and ABC acceptor **8** (1.15 g, 0.831 mmol) were combined, azeotroped twice with anhydrous benzene (2  $\times$  20 mL) and placed under high vacuum for 5 h. The mixture was then dissolved in CH<sub>2</sub>Cl<sub>2</sub> (20 mL) and Et<sub>2</sub>O (40 mL), treated with freshly activated 4 Å molecular sieves (2 g) and 2,6-di-*tert*-butylpyridine (734  $\mu$ L, 3.32 mmol), then cooled to -78 °C. Methyl triflate (4.0 equiv, 365  $\mu$ L) was added in one portion and the reaction was allowed to warm to rt slowly overnight. The reaction was quenched by the addition of Et<sub>3</sub>N (5 mL), and filtered through Celite with Et<sub>2</sub>O. The filtrate was washed with saturated NaHCO<sub>3</sub>, and brine, and dried over MgSO<sub>4</sub>. Concentration and purification by silica gel chromatography (15-20% EtOAc/hexane) afforded 1.551 g (72%) of hexasaccharide **9**. <sup>1</sup>H NMR (CDCl<sub>3</sub>, 500 MHz):  $\delta$  7.66 (d, *J* = 7.3 Hz, 2H), 7.35-6.94 (m, 63H), 5.77-5.69 (m, 1H), 5.10 (s, 1H), 5.02-4.99 (m, 2H), 4.95-4.91 (m, 3H), 4.89-4.87 (m, 1H), 4.84-4.51 (m, 11H), 4.43-4.31 (m, 4H), 4.26-4.19 (m, 3H), 4.11-3.13 (m, 40H), 2.98-2.95 (m, 1H), 2.78-2.77 (m, 1H), 2.66-2.64 (m, 1H), 2.09-2.04 (m, 2H), 1.68-1.62 (m, 2H), 1.13 (d, *J* = 6.4 Hz, 3H), 1.03-0.97 (m, 42H); <sup>13</sup>C NMR (CDCl<sub>3</sub>, 150 MHz):  $\delta$  155.7, 141.0, 139.6, 139.2, 138.99, 138.96, 138.9, 138.8, 138.7, 138.6, 138.4, 138.3, 138.2, 132.3, 129.1, 128.9, 128.78, 128.75, 128.6, 128.54, 128.46, 128.43, 128.40, 128.37, 128.32, 128.30, 128.26, 128.16, 128.13, 127.96,

127.89, 127.86, 127.85, 127.8, 127.72, 127.66, 127.61, 127.59, 127.55, 127.5, 127.4, 115.1, 103.8, 103.4, 102.9, 99.9, 99.4, 98.1, 83.5, 81.9, 81.6, 80.7, 79.6, 79.2, 78.5, 78.1, 77.9, 77.7, 76.7, 75.6, 75.5, 75.4, 75.3, 75.2, 75.0, 74.2, 73.4, 73.3, 73.2, 72.8, 72.2, 72.1, 71.6, 71.5, 69.6, 69.53, 69.46, 68.5, 68.4, 68.3, 68.0, 67.8, 62.2, 62.0, 56.3, 30.4, 29.2, 18.27, 18.25, 18.21, 18.18, 18.1, 17.9, 17.1, 12.12, 12.09; ESI-MS calcd for  $C_{150}H_{185}NO_{32}SSi_2Na^+$  2623.20 (M + Na)<sup>+</sup>; found: 2624.41.

**4-Pentenyl 2,3,4-tri-O-acetyl- $\alpha$ -L-fucopyranosyl-(1 $\rightarrow$ 2)-3,4,6-tri-O-acetyl- $\beta$ -D-galactopyranosyl-(1 $\rightarrow$ 3)-4,6-O-tri-acetyl-2-acetylamino-2-deoxy- $\beta$ -D-galactopyranosyl-(1 $\rightarrow$ 3)-2,4,6-tri-O-acetyl- $\alpha$ -D-galactopyranosyl-(1 $\rightarrow$ 4)-2,3,6-tri-O-acetyl- $\beta$ -D-galactopyranosyl-(1 $\rightarrow$ 4)-2,3,6-tri-O-acetyl- $\beta$ -D-glucopyranoside (10).**<sup>2</sup> TBAF (1.0 M in THF, 37.34 mL, 60 equiv.) was added to a solution of the hexasaccharide **9** (1.62 g, 0.622 mmol) and acetic acid (2.14 mL, 60 equiv.) in THF (35 mL). The reaction was stirred at rt for 3 days, poured into ice water and extracted with EtOAc. The organic extracts were washed with saturated NaHCO<sub>3</sub> and brine, dried over MgSO<sub>4</sub> and concentrated to an oil which was purified through a short plug of silica gel with EtOAc. The resulting triol was dissolved in anhydrous MeOH (20 mL) and sodium methoxide was added (0.75 mL of a 25% solution in MeOH). The reaction was stirred at rt for 18 h, neutralized with Dowex-H<sup>+</sup>, filtered with MeOH washings and concentrated. THF (5 mL) and condensed liquid NH<sub>3</sub> (~70 mL) were added at -78 °C to the resulting white solid. Sodium (~1.2 g) was added and the resulting blue solution stirred at -78 °C for 2 h. The reaction was quenched with anhydrous MeOH (~30 mL), brought to rt and concentrated under a stream of dry N<sub>2</sub> to a volume of ~15 mL. The reaction was neutralized with Dowex-H<sup>+</sup>, filtered with MeOH washing and concentrated to a white solid. The white solid was dissolved in pyridine (10 mL) and CH<sub>2</sub>Cl<sub>2</sub> (10 mL) and cooled to 0 °C. A crystal of DMAP was added followed by acetic anhydride (10 mL). The ice bath was removed and the reaction stirred at rt overnight. The mixture was diluted with EtOAc and washed with water, saturated NaHCO<sub>3</sub> and brine, dried over MgSO<sub>4</sub>. Concentration followed by purification by flash column chromatography (gradient elution 60% EtOAc/CH<sub>2</sub>Cl<sub>2</sub>) gave **10** as a white solid (470 mg, 42%). <sup>1</sup>H NMR (600 MHz, CDCl<sub>3</sub>)  $\delta$  6.74 (d, *J* = 6.5 Hz, 1H), 5.80-5.73 (m, 1H), 5.58 (d, *J* = 2.8 Hz, 1H), 5.44 (d, *J* = 3.4 Hz, 1H), 5.39 (d, *J* = 3.2 Hz, 1H), 5.27 (dd, *J* = 10.9, 3.0 Hz, 1H), 5.24-5.08 (m, 6H), 5.04-4.92 (m, 6H), 4.87 (t, *J* = 8.0 Hz, 1H), 4.74 (dd, *J* = 10.9, 2.5 Hz, 1H), 4.52-4.40 (m, 6H), 4.36 (t, *J* = 6.1 Hz, 1H), 4.26 (dd, *J* = 10.6, 3.4 Hz, 1H), 4.18-4.04 (m, 8H), 3.99 (d, *J* = 1.9 Hz, 1H), 3.95 (t, *J* = 6.3 Hz, 1H), 3.88-3.82 (m, 3H), 3.76-3.74 (m, 1H), 3.61-3.59 (m, 1H), 3.49-3.46 (m, 1H), 3.06-3.01 (m, 1H), 2.15-2.14 (m, 12H), 2.10-2.03 (m, 29H), 2.00 (s, 3H), 1.96 (s, 2 $\times$ 3H), 1.95 (s, 3H), 1.90 (s, 3H), 1.71-1.59 (m, 2H), 1.14 (d, *J* = 6.5 Hz, 3H); <sup>13</sup>C NMR (CDCl<sub>3</sub>, 150 MHz)  $\delta$  172.5, 171.7, 171.0, 170.81, 170.78, 170.75, 170.7, 170.60, 170.59, 170.5, 170.3, 170.0, 169.8, 169.7, 169.2, 138.0, 115.3, 102.2, 101.5, 100.7, 99.5, 99.0, 94.6, 76.3, 73.9, 73.6, 73.4, 72.8, 72.6, 72.1, 72.0, 71.8, 71.5, 71.1, 70.91, 70.86, 70.4, 70.3, 69.5, 69.4, 69.1, 68.3, 68.2, 67.8, 67.5, 64.7, 62.5, 62.0, 61.6, 61.4, 61.2, 56.4, 30.0, 28.8, 23.3, 21.10, 21.09, 21.03, 21.00, 20.98, 20.95, 20.91, 20.89, 20.87, 20.83, 20.82, 20.80, 20.74, 20.68, 16.1; ESI-MS calcd for  $C_{77}H_{107}NO_{47}Na^+$  1820.59 (M + Na)<sup>+</sup>; found: 1821.17.

## References

1. Park, T. K.; Kim, I. J.; Hu, S.; Bilodeau, M. T.; Randolph, J. T.; Kwon, O.; Danishefsky, S. J. *J. Am. Chem. Soc.*, **1996**, *118*, 11488-11500.
2. Allen, J. R.; Allen, J. G.; Zhang, X.-F.; Williams, L. J.; Zatorski, A.; Ragupathi, G.; Livingston, P. O.; Danishefsky, S. J. *Chem. Eur. J.*, **2000**, *6*, 1366-1375.

Scale: 0.4034 ppm/cm, 201.8 Hz/cm

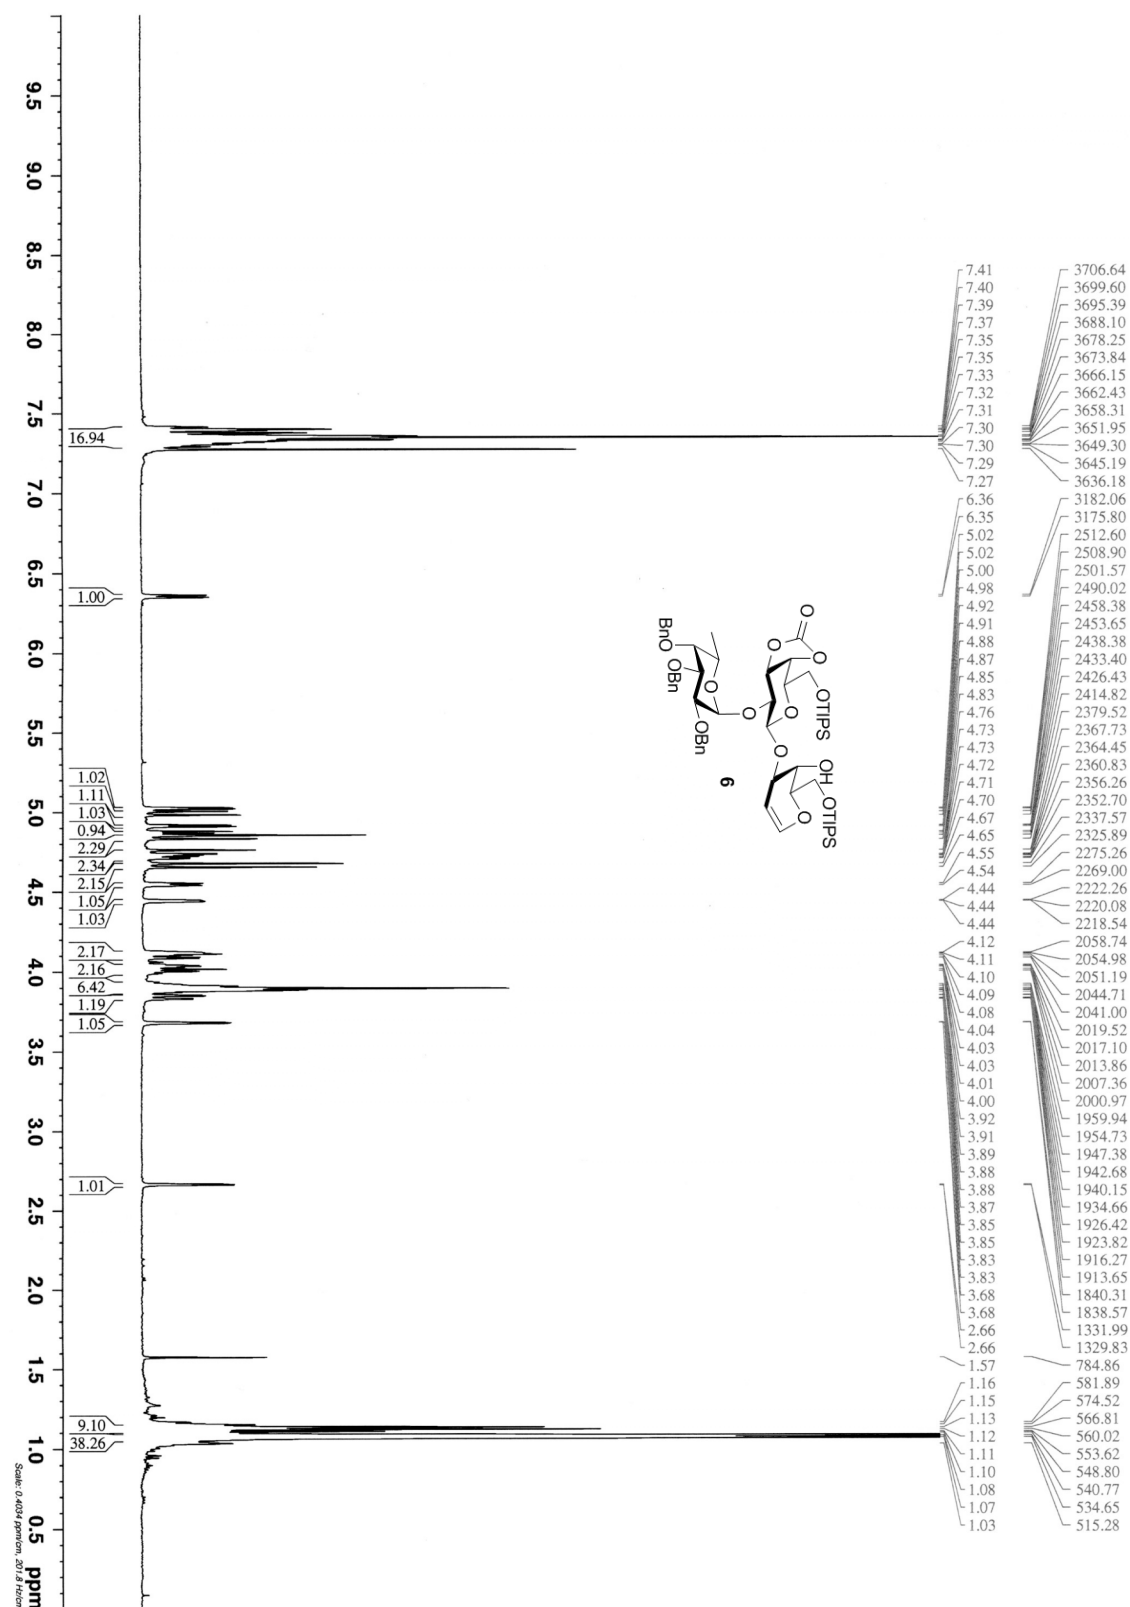

trisaccharide 6 is-2-115 (1 1) CDCl<sub>3</sub> 24.0C February\_04,2009\_17:45 DFX 500MHz zg30 1H \*

500 MHz  $^1\text{H}$  NMR spectrum of ABC acceptor **8** in  $\text{CDCl}_3$

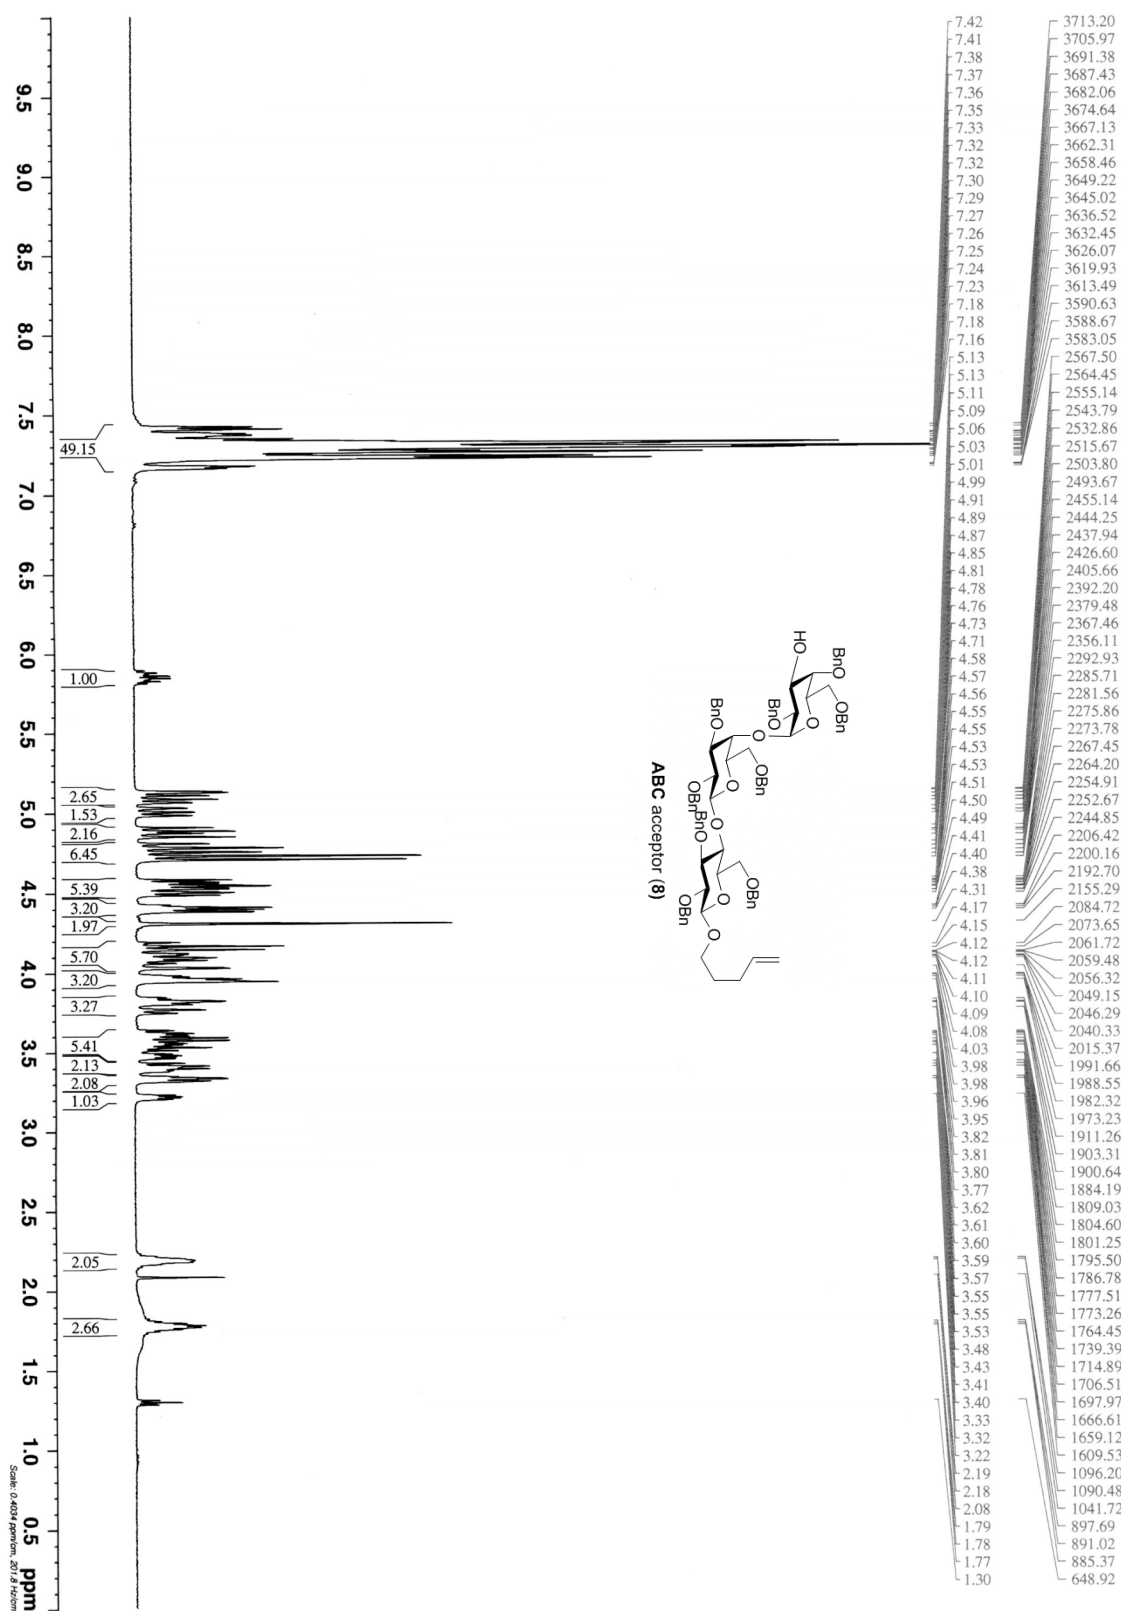

500 MHz  $^1\text{H}$  NMR spectrum of DEF donor 7 in  $\text{CDCl}_3$

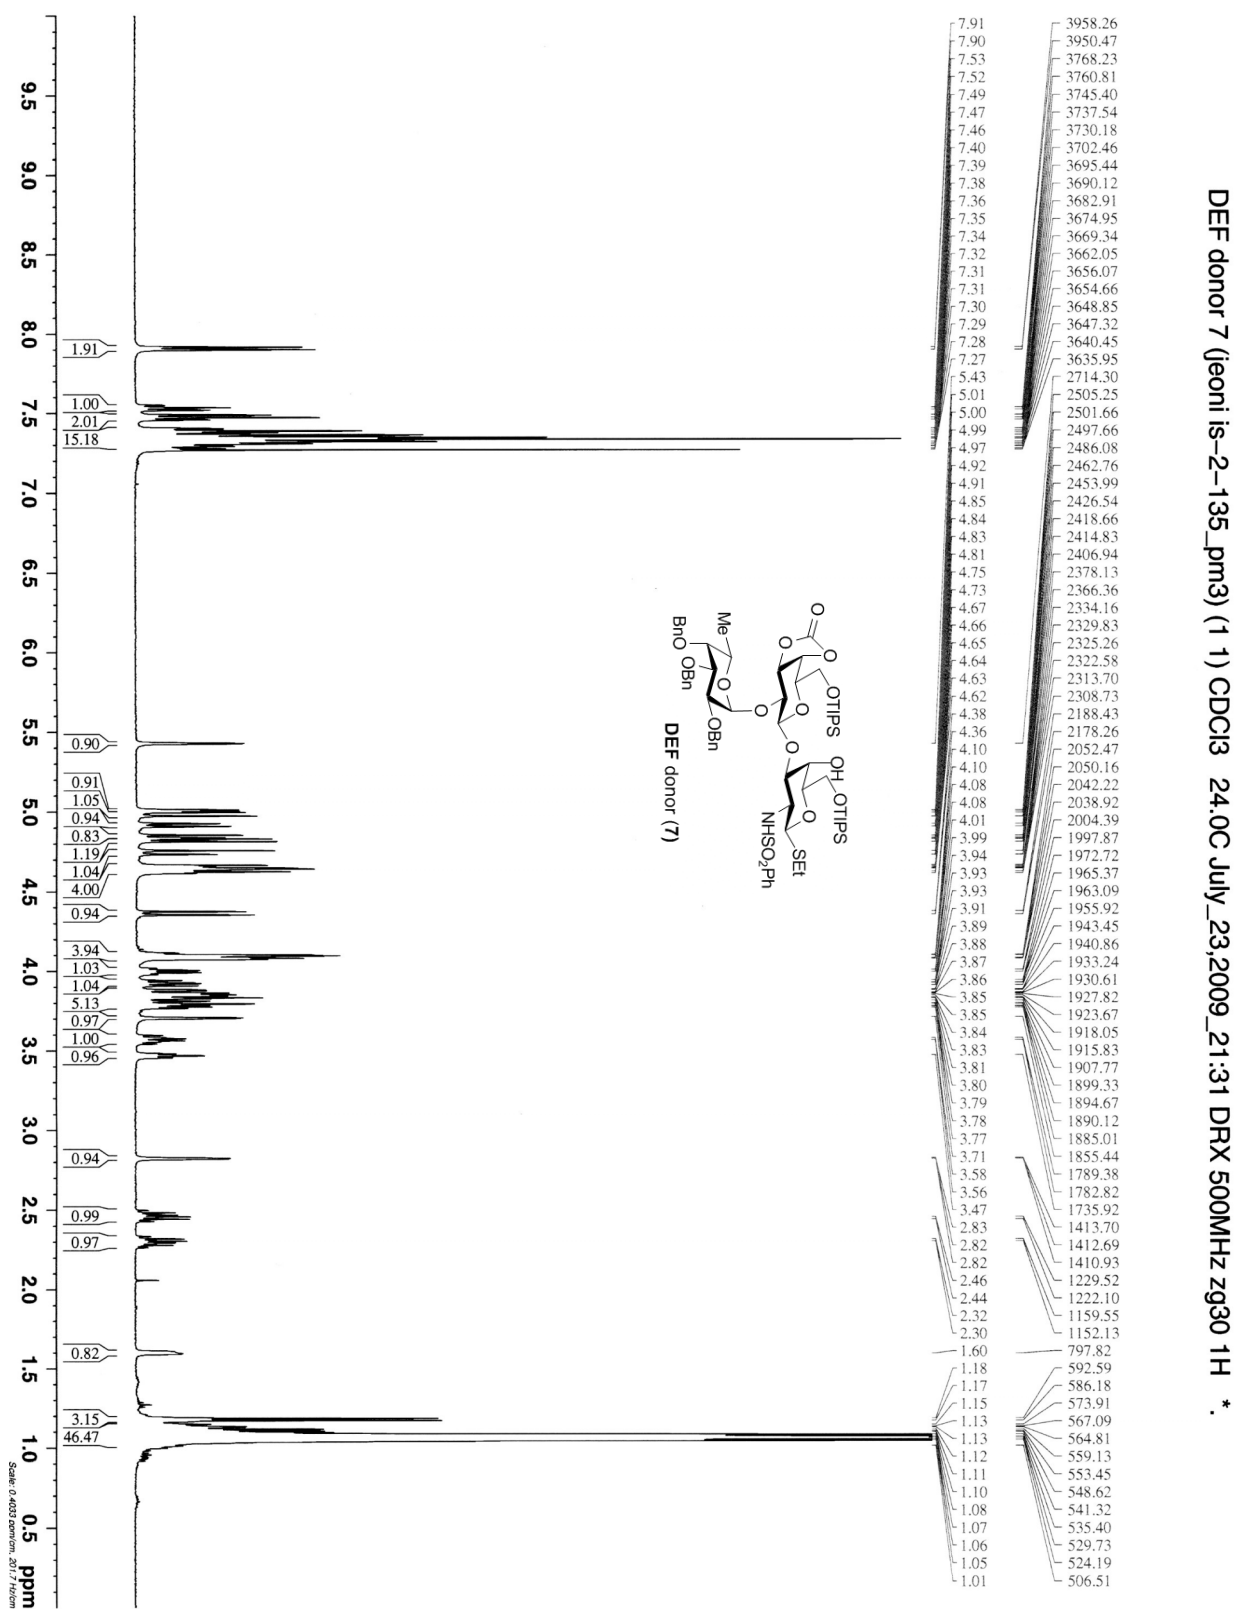

500 MHz  $^1\text{H}$  NMR spectrum of hexasaccharide **9** in  $\text{CDCl}_3$

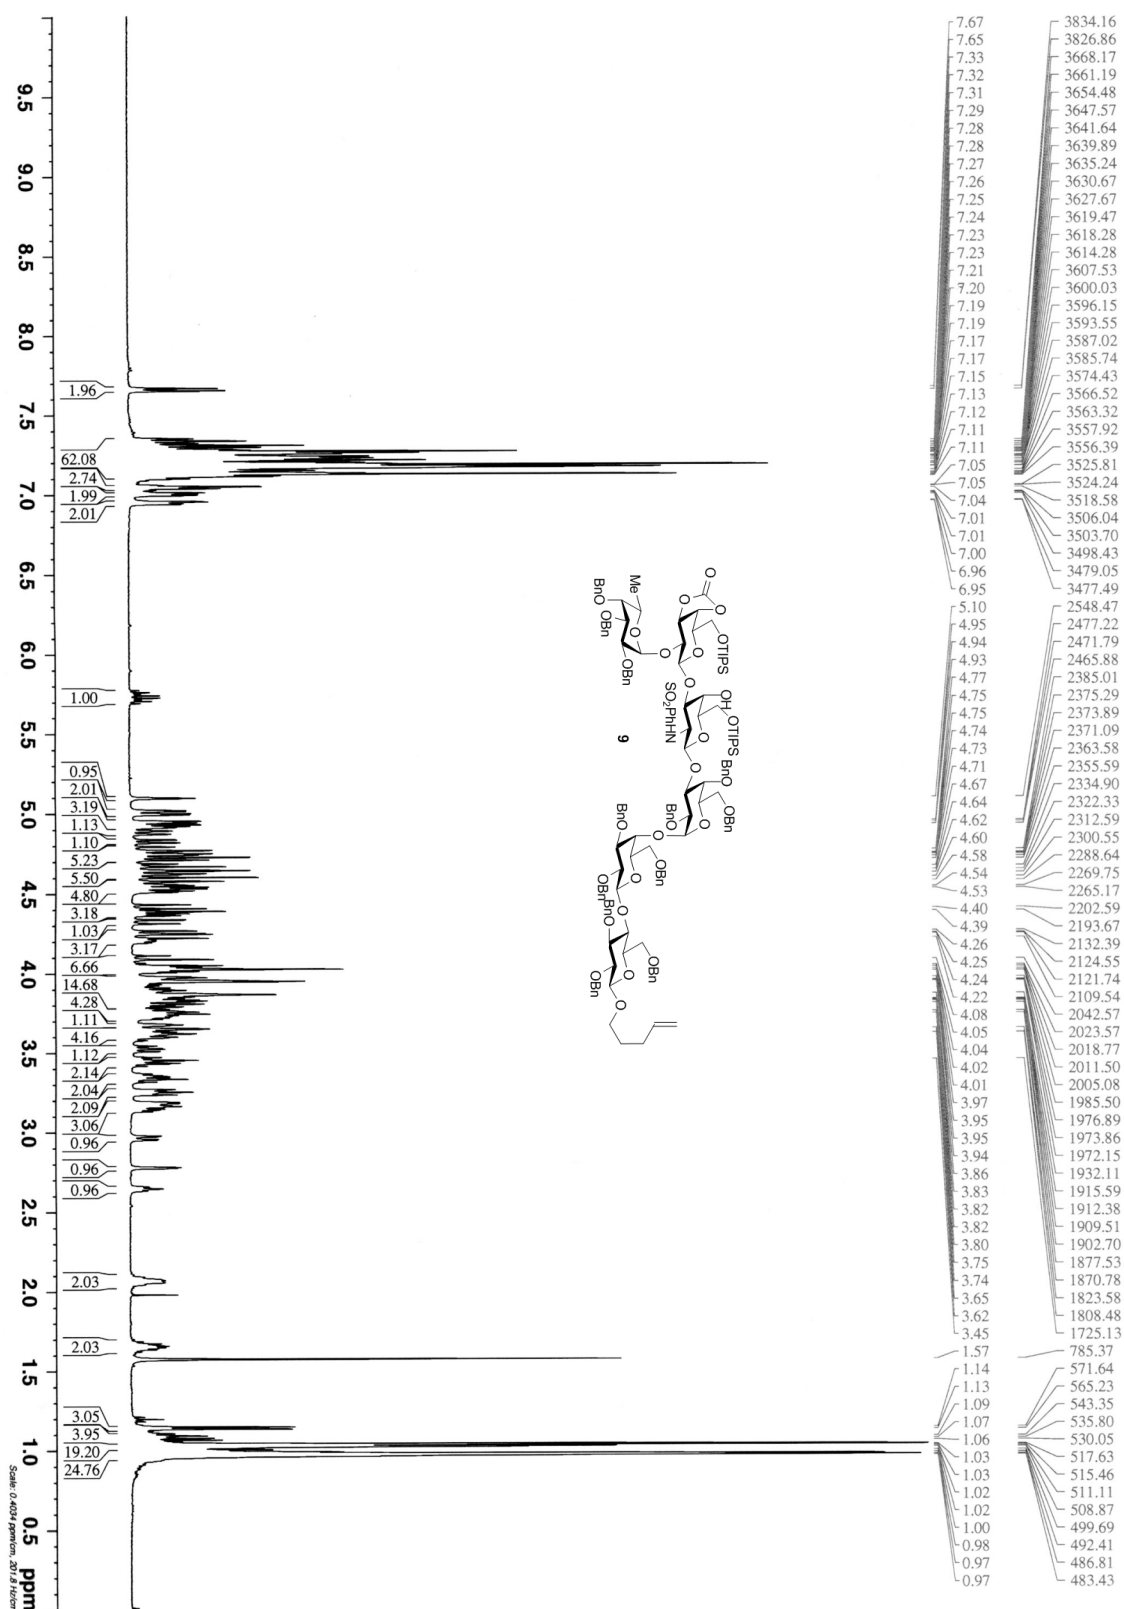

hexasaccharide **9** is-2-183 (1)  $\text{CDCl}_3$  24.0C June\_19,2009\_09:10 DRX 500MHz zg30 1H \*

150 MHz  $^{13}\text{C}$  NMR spectrum of hexasaccharide **9** in  $\text{CDCl}_3$

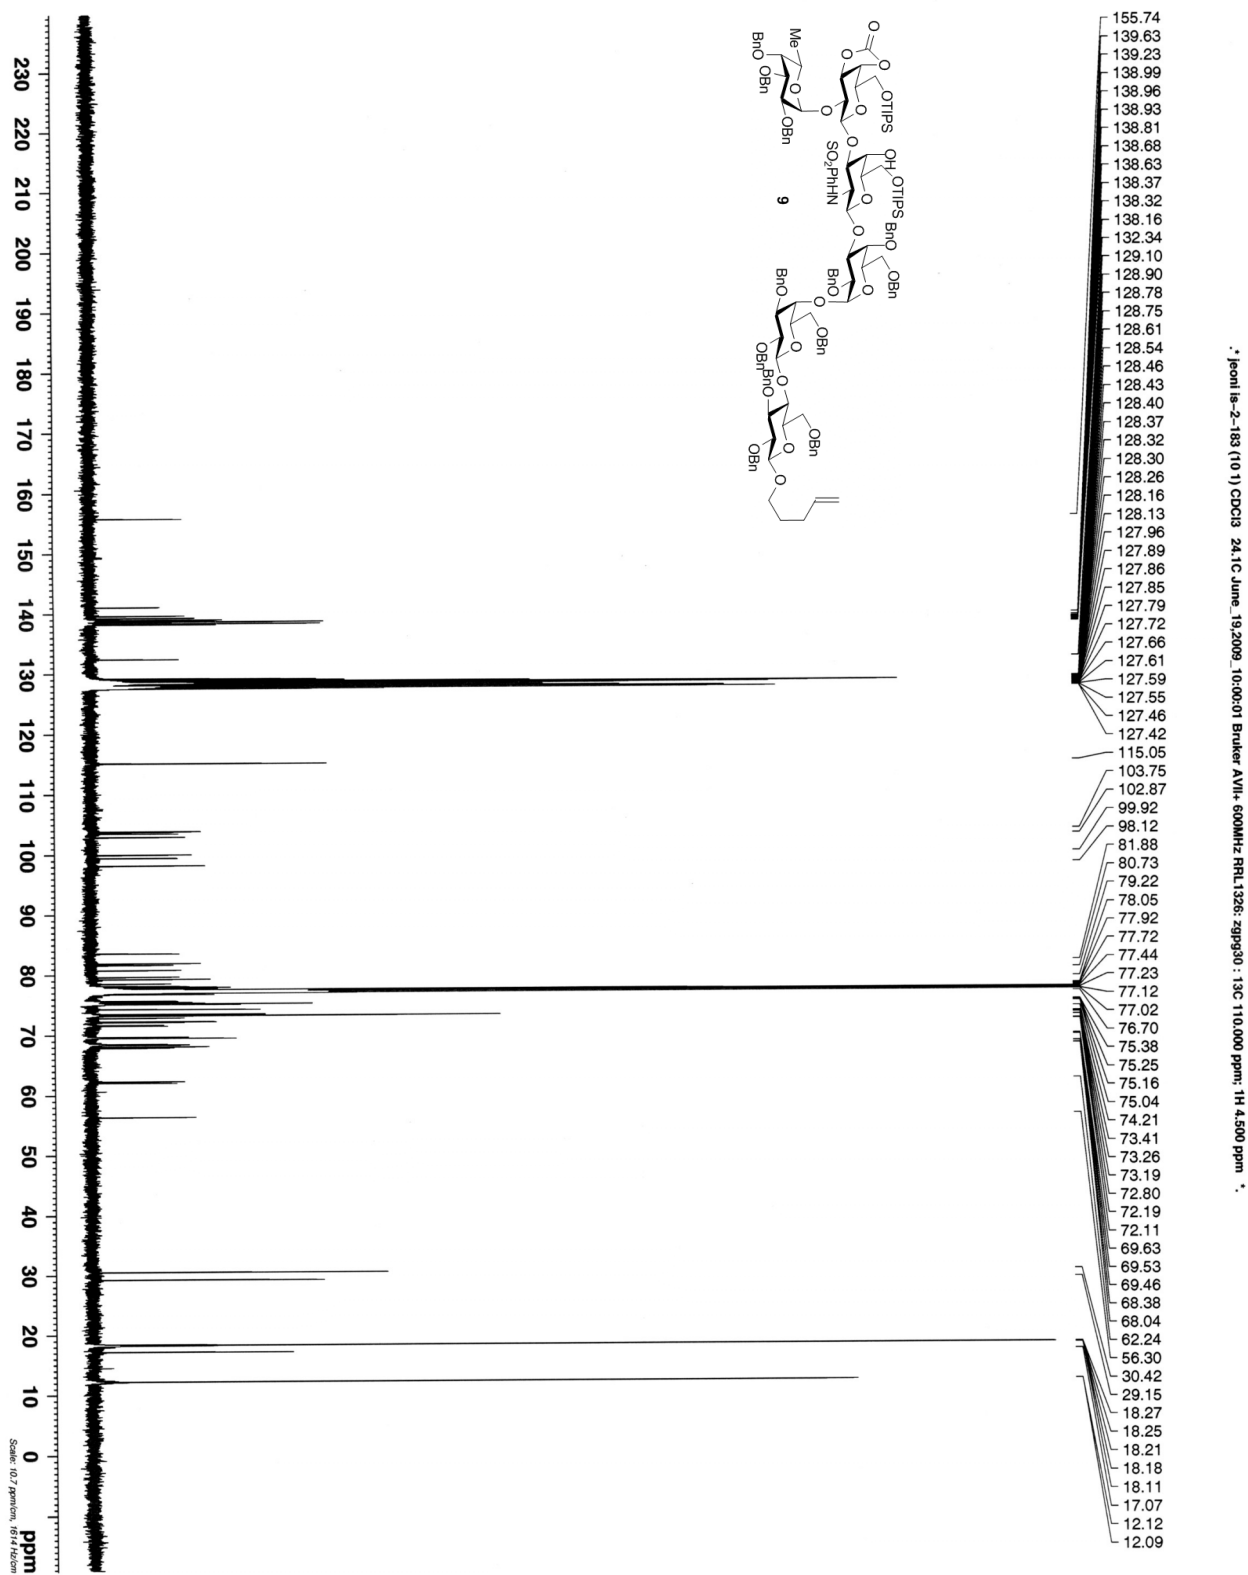

600 MHz  $^1\text{H}$  NMR spectrum of hexasaccharide **10** in  $\text{CDCl}_3$

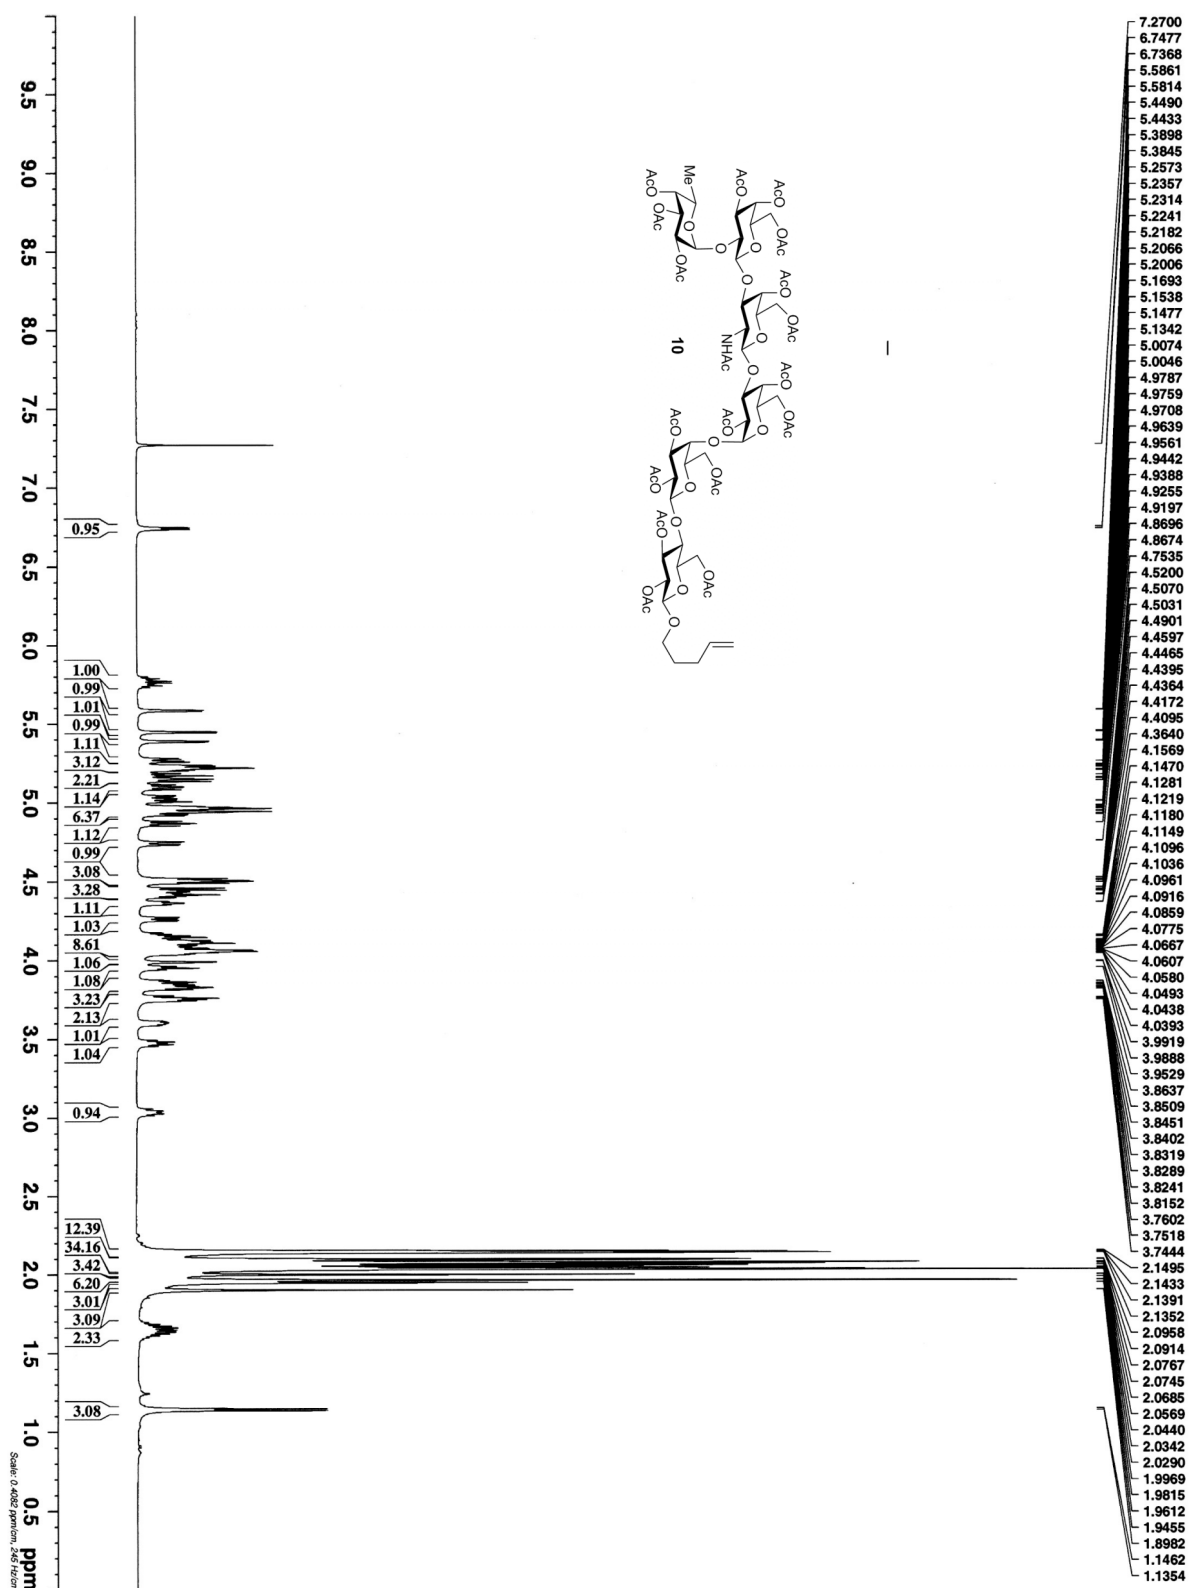

150 MHz  $^{13}\text{C}$  NMR spectrum of hexasaccharide **10** in  $\text{CDCl}_3$

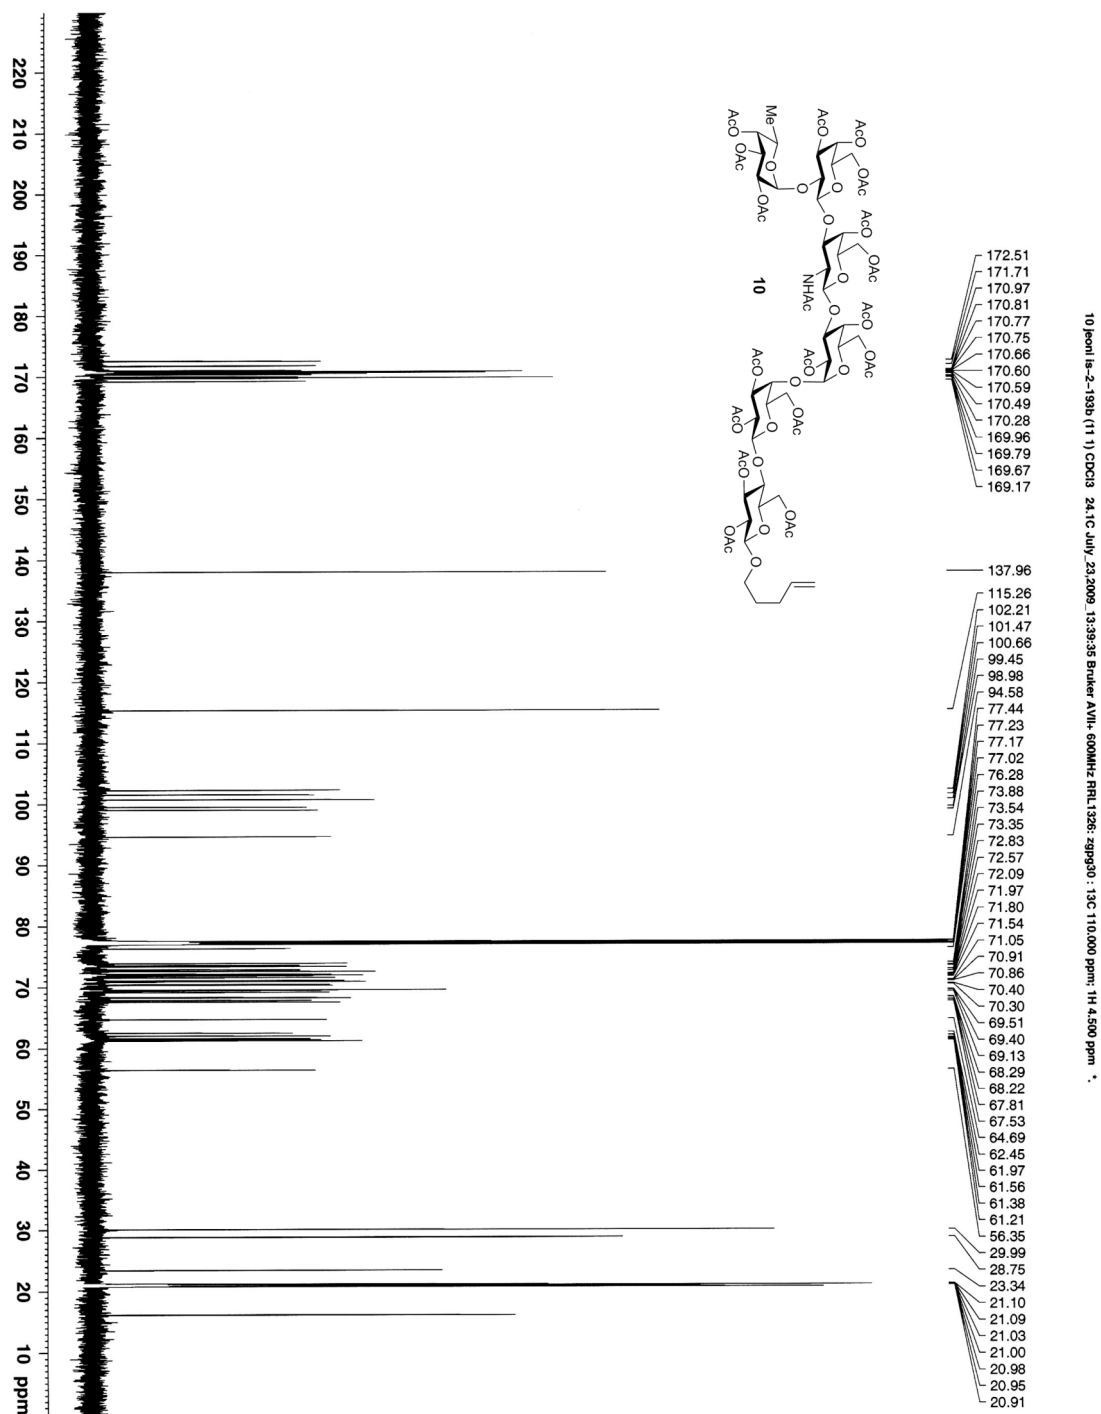

Supplement: Supplementary file 1 [file 4510600]
